# Supplementary material for: Identification of a Steric Zipper Motif in the Amyloidogenic Core of Human Cystatin C and Its Use for the Design of Self-Assembling Peptides
Source: MDPI journal article supplement (doi:10.3390/ijms23105800), 2022-05-22
Supplement: s1 [file s1]

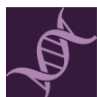

*Supplementary materials*

*Article*

# Identification of a Steric Zipper Motif in the Amyloidogenic Core of Human Cystatin C and Its Use for the Design of Self-Assembling Peptides

Emilia Iłowska <sup>1,\*</sup>, Jakub Barciszewski <sup>2</sup>, Mariusz Jaskólski <sup>2,3</sup>, Augustyn Moliński <sup>4,5</sup>, Maciej Kozak <sup>4</sup> and Aneta Szymańska <sup>6</sup>

<sup>1</sup> Department of Organic Chemistry, Faculty of Chemistry, University of Gdansk, 80-308 Gdansk, Poland

<sup>2</sup> Institute of Bioorganic Chemistry, Polish Academy of Sciences, 61-704 Poznan, Poland; agent007@man.poznan.pl (J.B.); mariuszj@amu.edu.pl (M.J.)

<sup>3</sup> Department of Crystallography, Faculty of Chemistry, Adam Mickiewicz University in Poznan, 61-614 Poznan, Poland

<sup>4</sup> Department of Biomedical Physics, Faculty of Physics, Adam Mickiewicz University in Poznan, 61-614 Poznan, Poland; augmol@amu.edu.pl (A.M.); mkozak@amu.edu.pl (M.K.)

<sup>5</sup> NanoBioMedical Centre, Adam Mickiewicz University in Poznan, 61-614 Poznan, Poland

<sup>6</sup> Department of Biomedical Chemistry, Faculty of Chemistry, University of Gdansk, 80-308 Gdansk, Poland; aneta.szymanska@ug.edu.pl

\* Correspondence: emilia.ilowska@ug.edu.pl



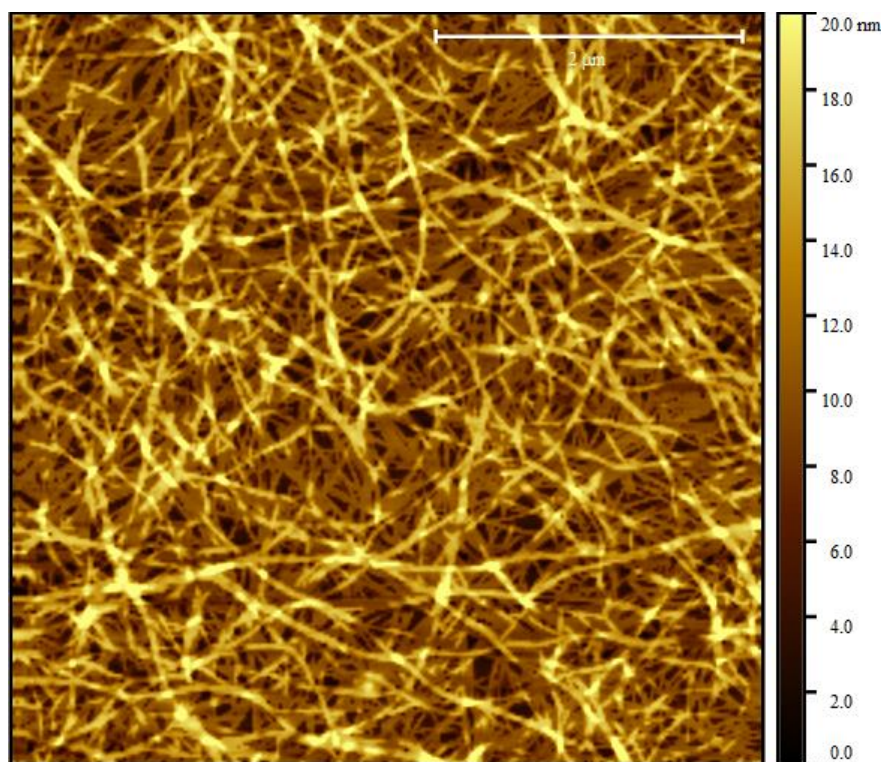

**Figure S1.** AFM image of CysZ13 after 21 days of incubation in PBS pH 7.4, concentration 1 mg/mL, 37 °C with agitation without washing before AFM analysis (see Atomic Force Microscopy, at section Materials and Methods).

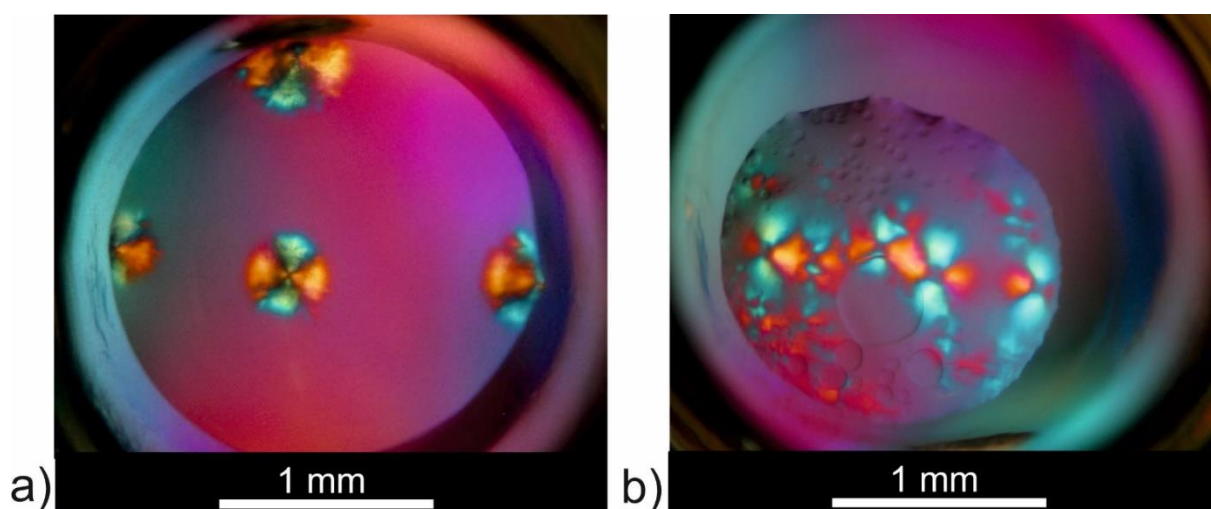

**Figure S2:** The crystallization drop of peptide (a) CysZ4 and (b) CysZ9. Under most crystallization conditions, precipitation and the “Maltese cross effect” were observed. Crystallization conditions: CysZ4: 1.9 M sodium malonate pH 6.0, C = 4 mg/mL; CysZ9: 2.4 M sodium malonate pH 5.0, C = 6 mg/mL.



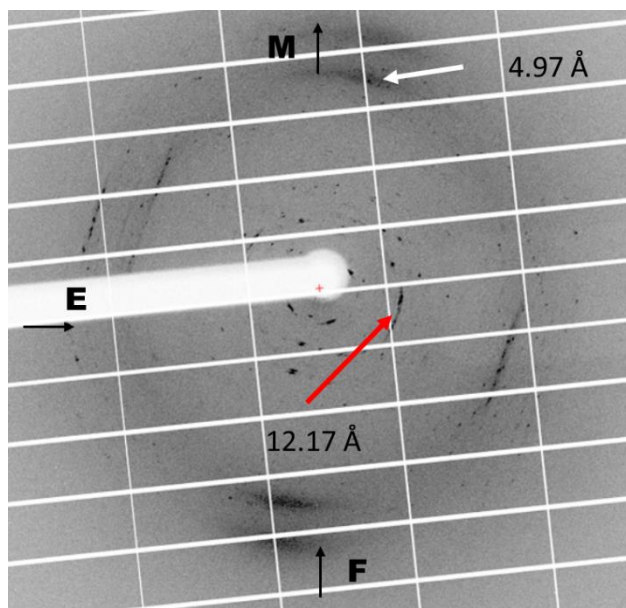

**Figure S3:** A diffraction image recorded for a crystal of CysZ9 with the strong meridional and equatorial reflections highlighted by white and red arrows, respectively. Crystallization conditions: 0.1 M  $\text{MgCl}_2$ , 100 mM sodium cacodylate, 15 % MPD,  $C = 4$  mg/mL. A single (cuboid) crystal was cryoprotected in mother liquor supplemented with 60 % (v/v) MPD and flash-vitrified at 100 K in a nitrogen gas stream. X-Ray diffraction data were collected using synchrotron radiation at beamline 14.1 of the BESSY II synchrotron, equipped with Dectris Pilatus 6M.
